# Supplementary material for: Nano-Chitosan/Eucalyptus Oil/Cellulose Acetate Nanofibers: Manufacturing, Antibacterial and Wound Healing Activities
Source: MDPI journal article supplement (doi:10.3390/membranes13060604), 2023-06-15
Supplement: s1 [file s1]

Supplementary material

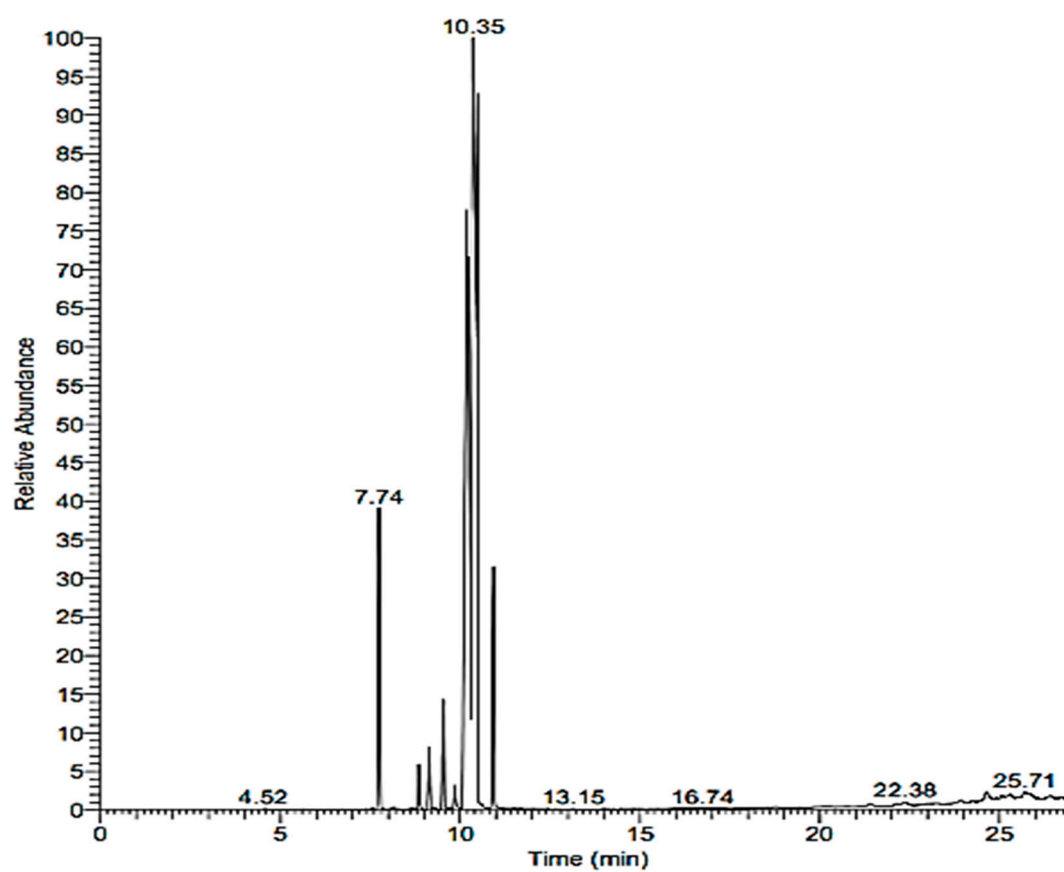

Figure S1. GC-MS chromatogram of *Eucalyptus* oil.

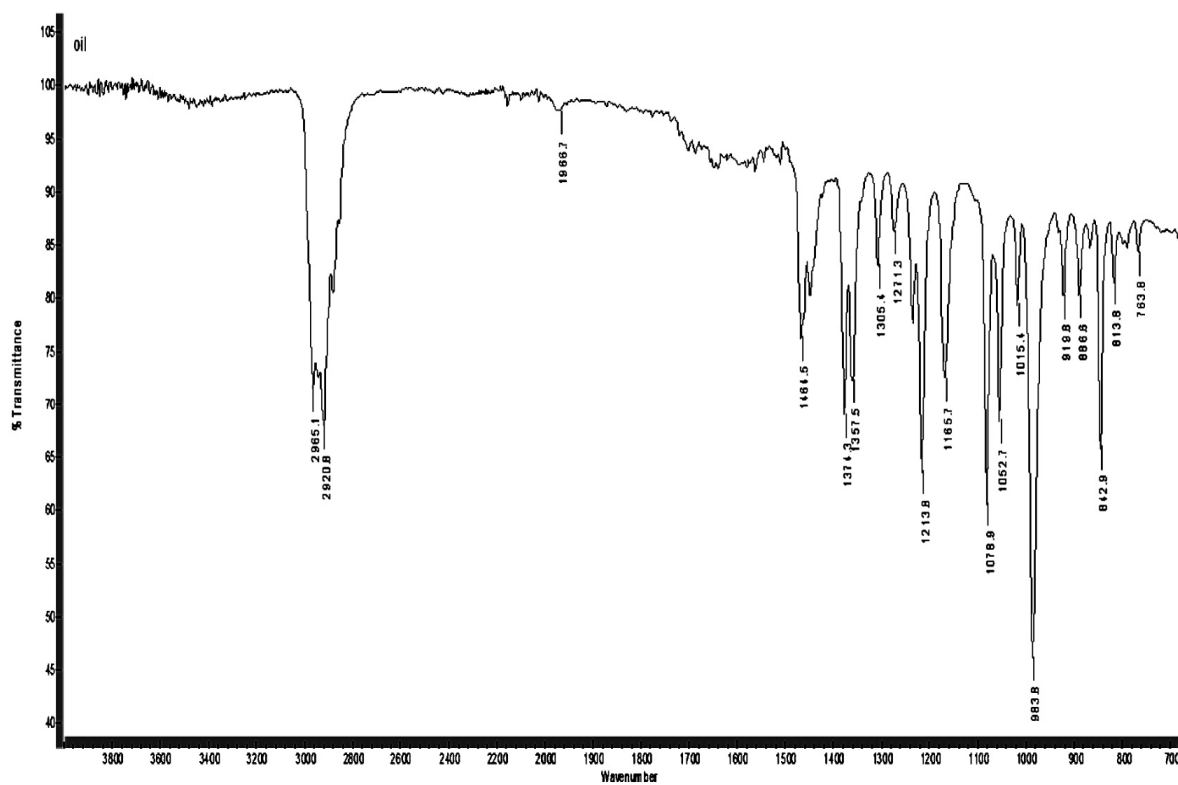

Figure S2. FTIR analysis of *Eucalyptus* oil.

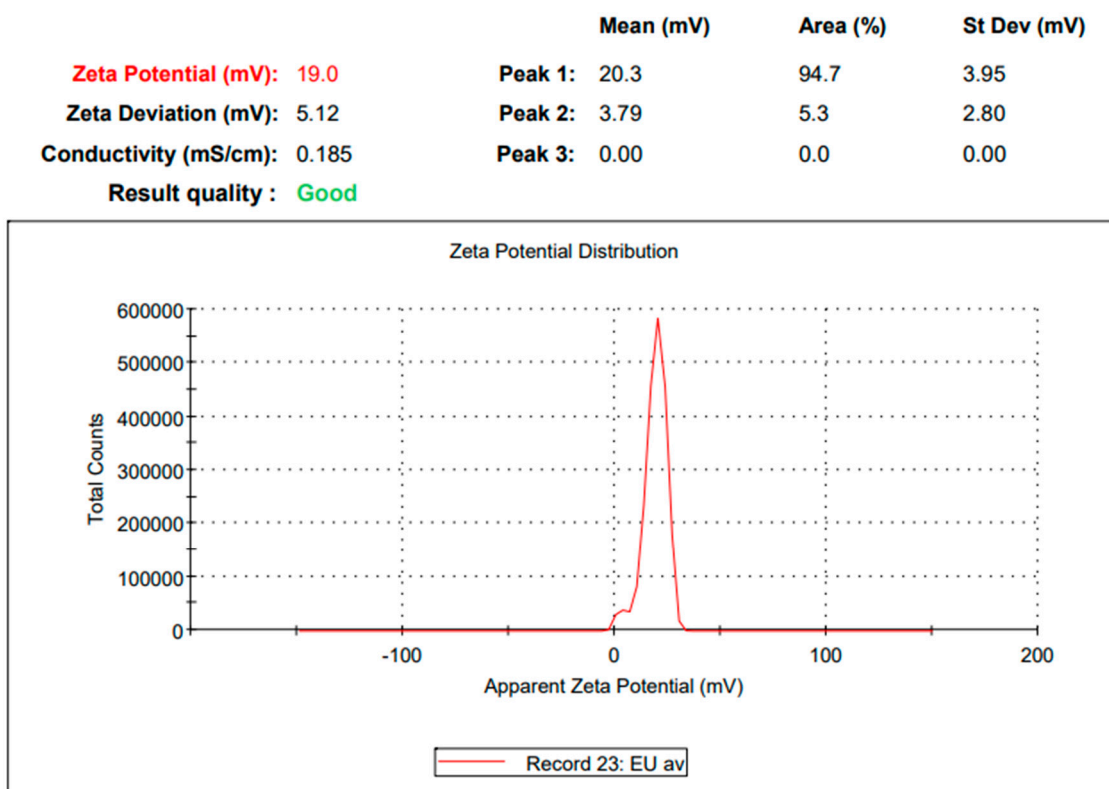

(a)

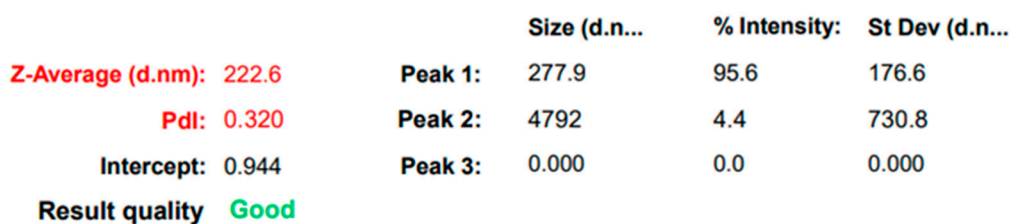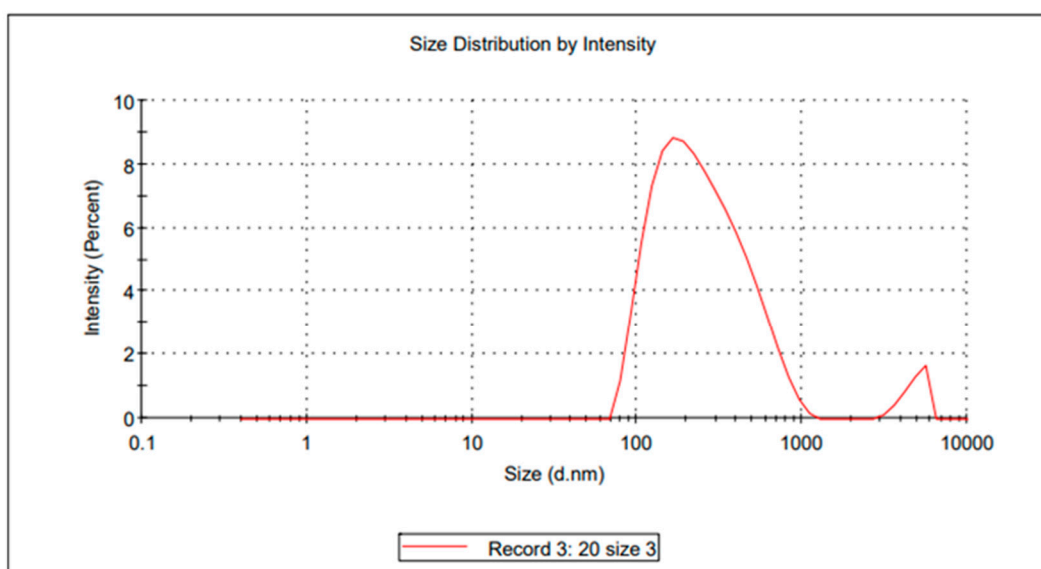

(b)

Figure S3. Zeta potential (a) and zeta size (b) of the prepared oil nanoparticles.

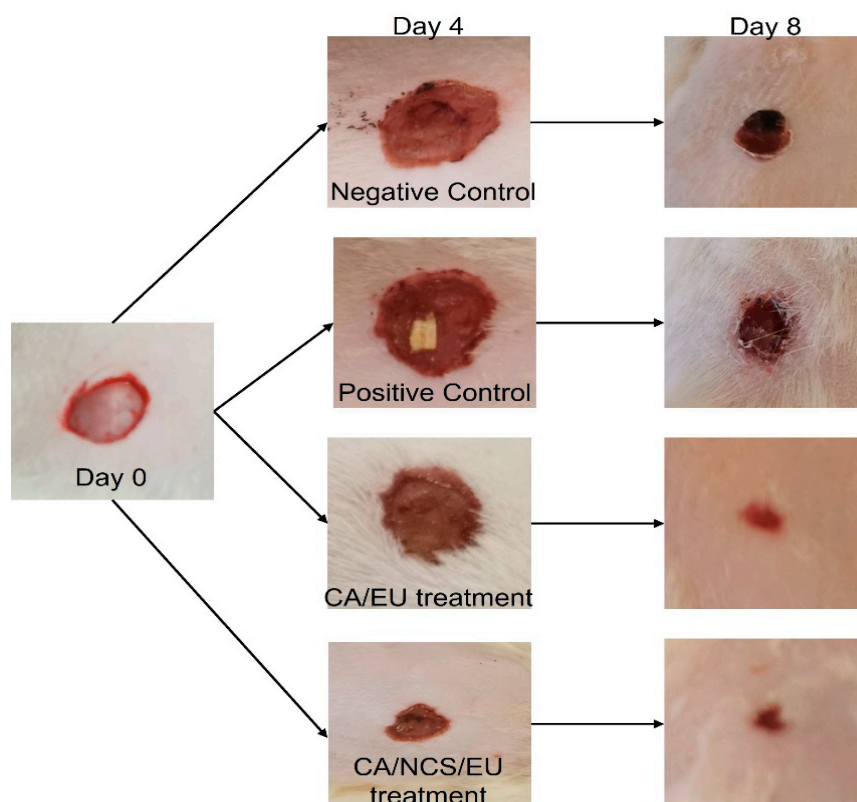

**Figure S4. Morphological features of rats' wounds.**
